# Supplementary material for: Preparation of the Key Dolutegravir Intermediate via MgBr2-Promoted Cyclization
Source: MDPI journal article supplement (doi:10.3390/molecules26102850), 2021-05-11
Supplement: s1 [file s1]

*Supporting Information*

# Preparation of the Key Dolutegravir Intermediate via MgBr<sub>2</sub>-Promoted Cyclization

Jiahui Kong <sup>1,2</sup>, Haijian Xia <sup>2</sup>, Renbao He <sup>2</sup>, Hao Chen <sup>2</sup> and Yongping Yu <sup>1,\*</sup>

<sup>1</sup> Zhejiang Province Key Laboratory of Anti-Cancer Drug Research, College of Pharmaceutical Science, Zhejiang University, Hangzhou 310058, China; jiahui.kong@yongtaitech.com (J.K.)

<sup>2</sup> Zhejiang Yongtai Technology Co. Ltd., Taizhou 317016, China; haijian.xia@yongtaitech.com (H.X.); renbao.he@yongtaitech.com (R.H.); a\_chenhaoHao@126.com (H.C.)

\* Correspondence: yyu@zju.edu.cn

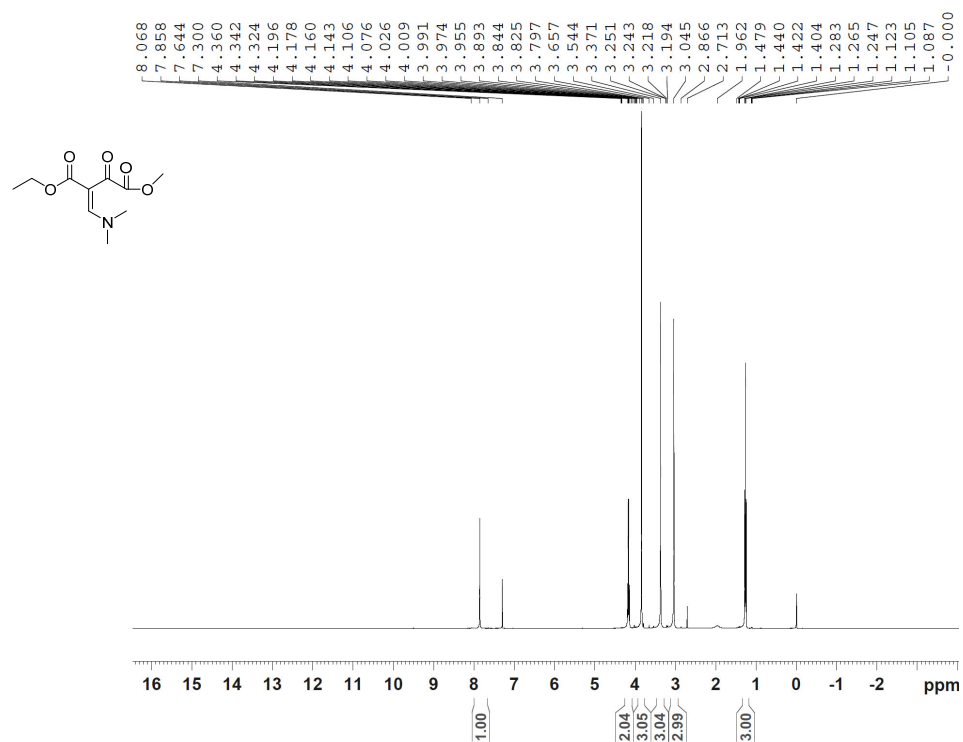

Figure S1. <sup>1</sup>H NMR spectra of P3 in CDCl<sub>3</sub>.

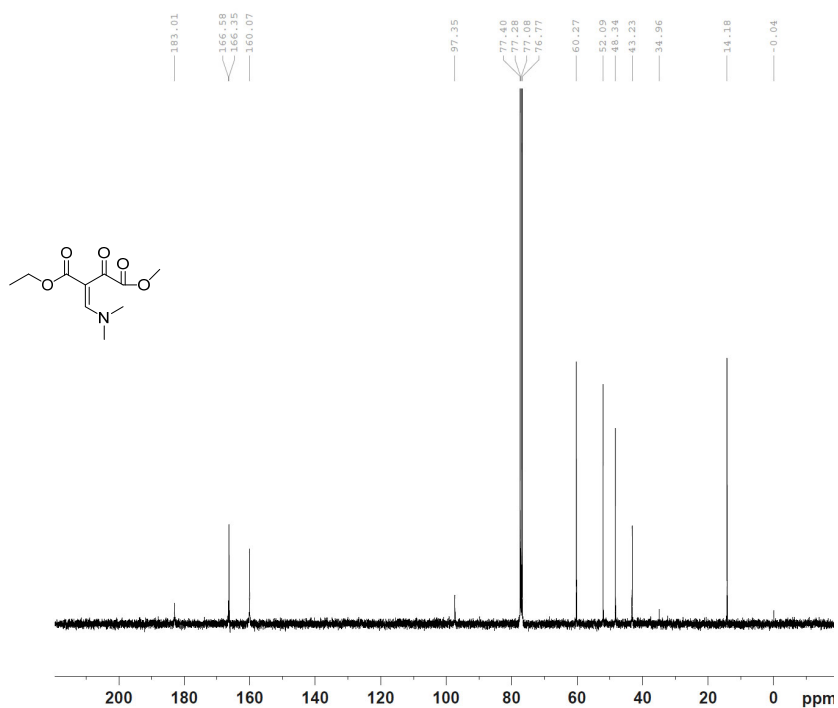

Figure S2. <sup>13</sup>C NMR spectra of P3 in CDCl<sub>3</sub>.

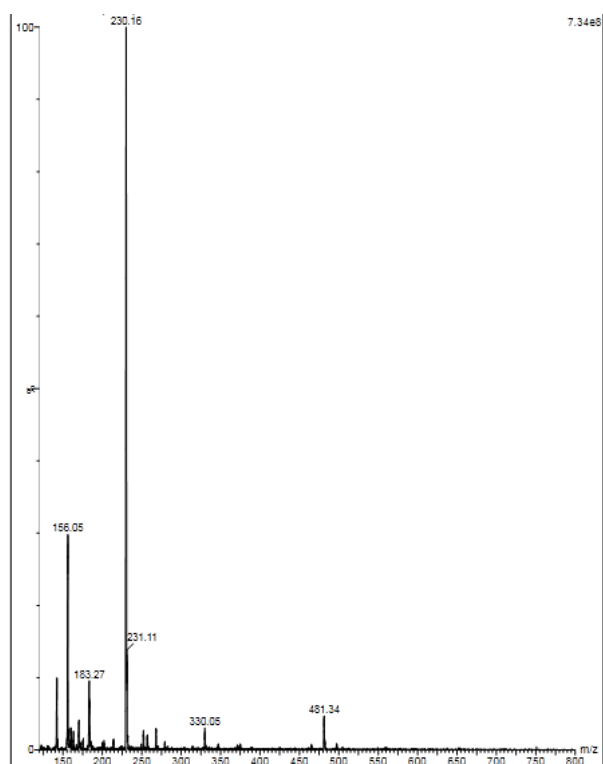

Figure S3. LCMS of P3.

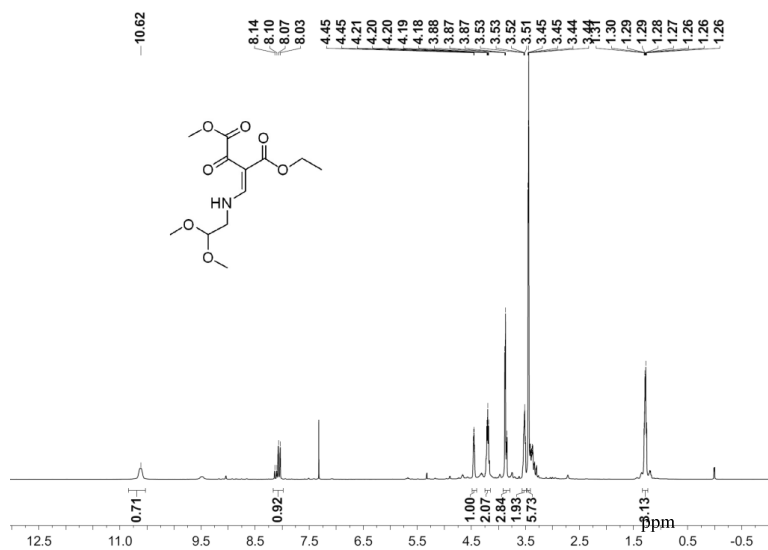

Figure S4. <sup>1</sup>H NMR spectra of P4 in CDCl<sub>3</sub>.

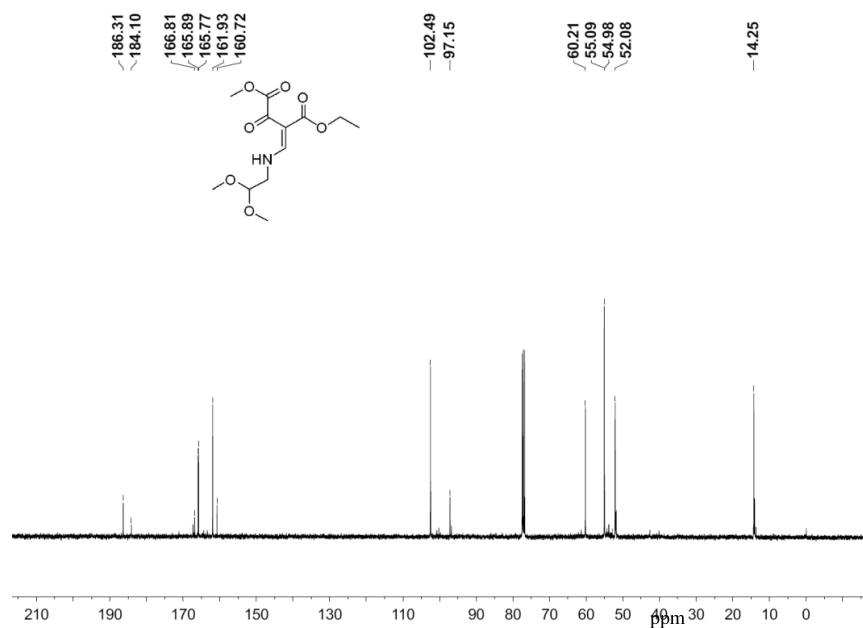

Figure S5. <sup>13</sup>CNMR spectra of P4 in CDCl<sub>3</sub>.

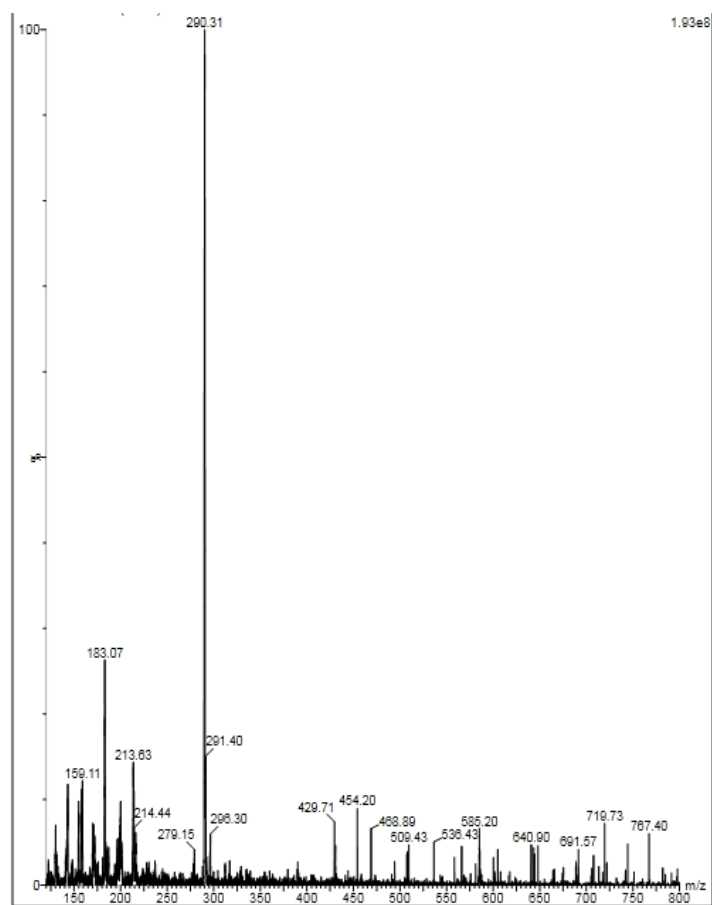

Figure S6. LCMS of P4.

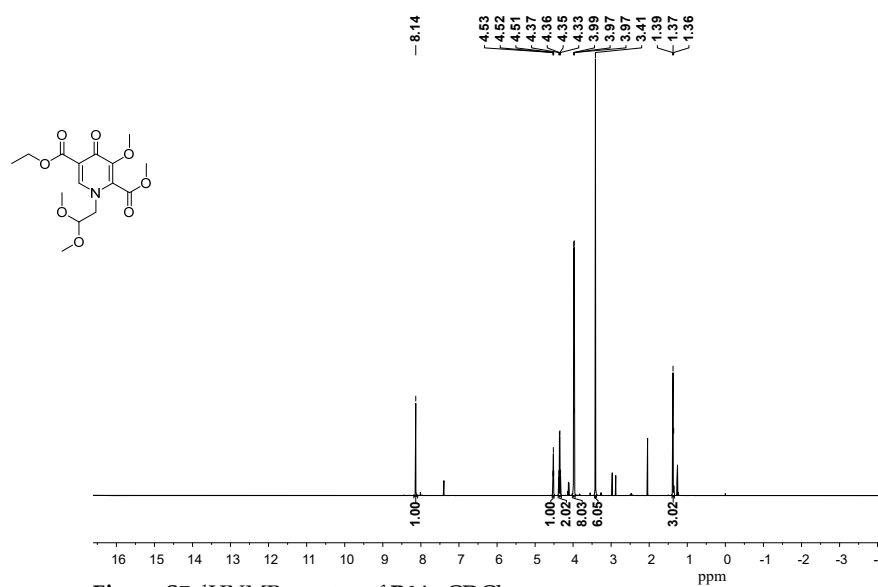

Figure S7. <sup>1</sup>H NMR spectra of P6 in CDCl<sub>3</sub>.

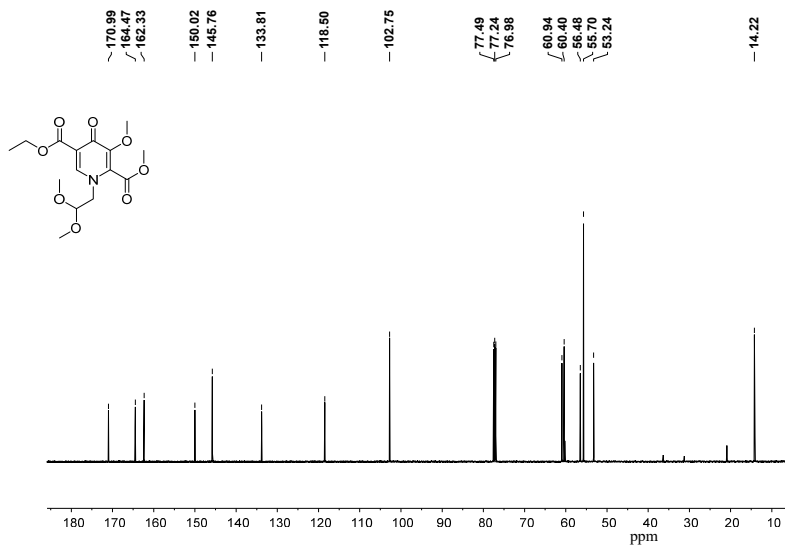

Figure S8. <sup>13</sup>C NMR spectra of P6 in CDCl<sub>3</sub>.

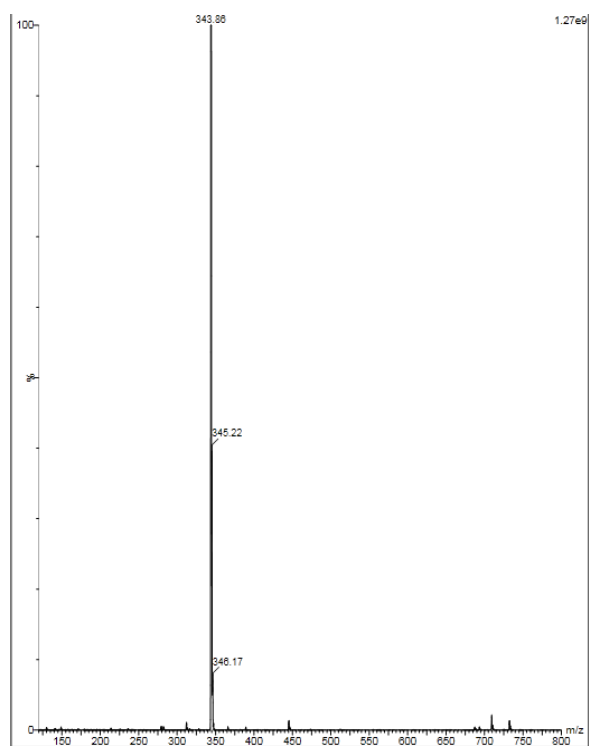

Figure S9. LCMS of P6.

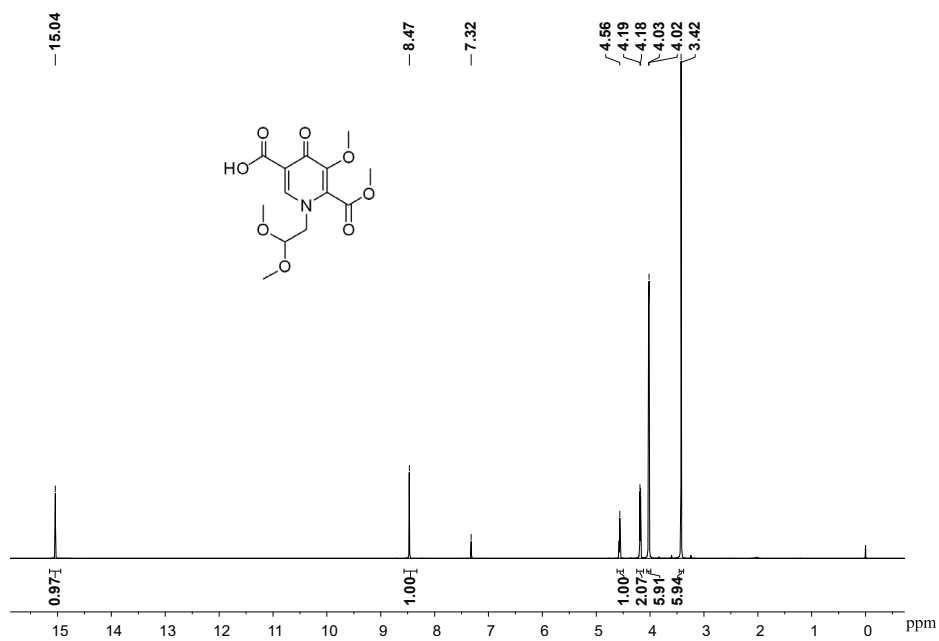

Figure S10. <sup>1</sup>H NMR spectra of 1 in CDCl<sub>3</sub>.

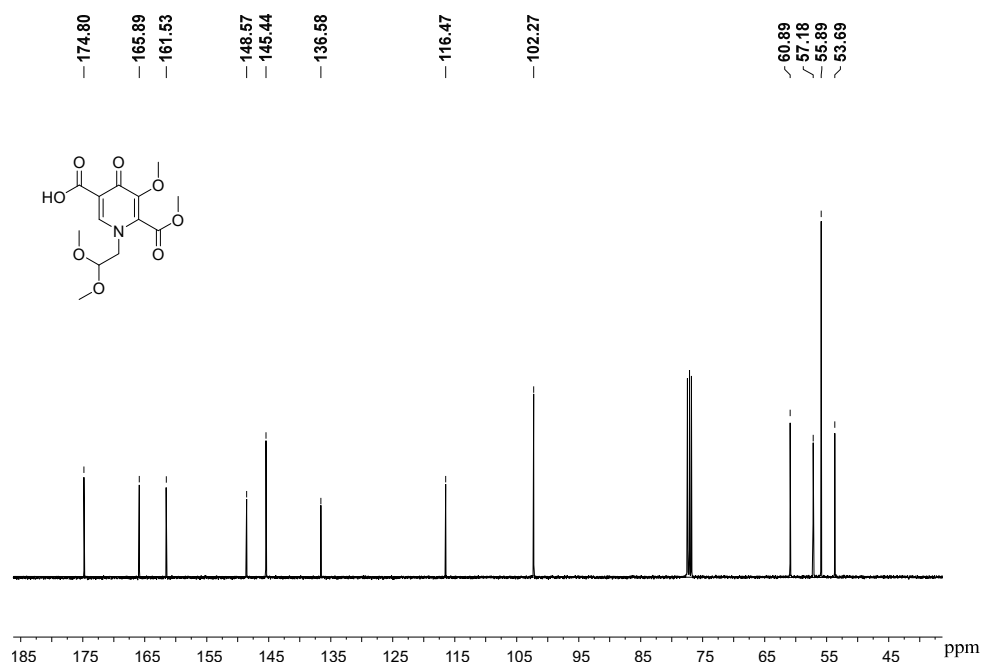

Figure S11. <sup>13</sup>CNMR spectra of 1 in CDCl<sub>3</sub>.

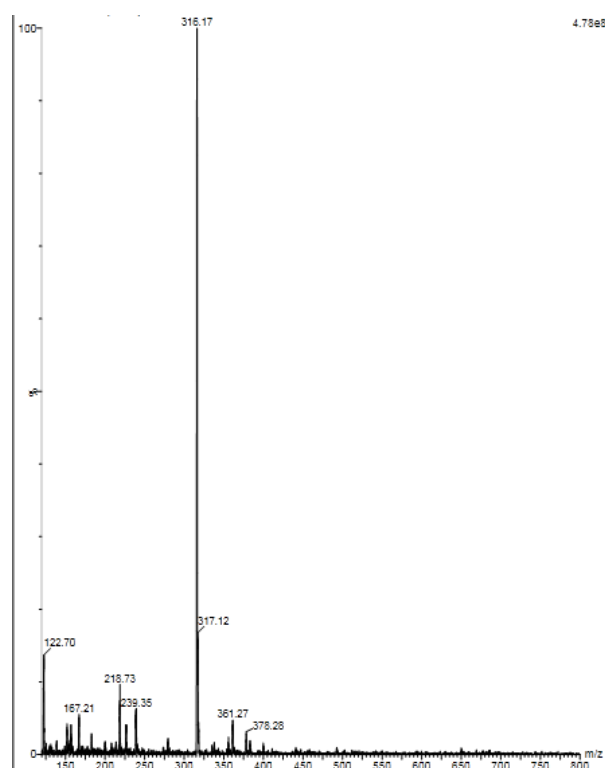

Figure S12. LCMS of 1.

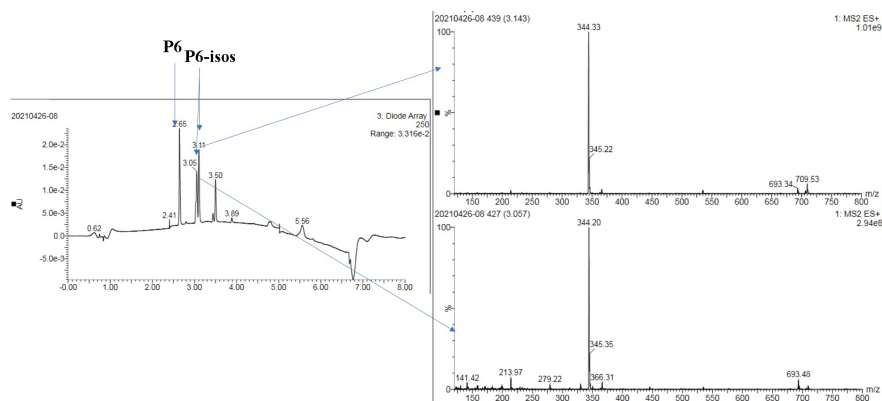

**Figure S13. LCMS of P6-isos**
